# Supplementary material for: c-MYC-Induced Sebaceous Gland Differentiation Is Controlled by an Androgen Receptor/p53 Axis
Source: PubMed Central journal article supplement (PMC3778892; doi:10.1016/j.celrep.2013.01.013), 2013-02-21
Supplement: mmc1.pdf [file mmc1.pdf]

**Table S1. Primary Antibodies Used**

| Species Reactivity in this paper | Antibody              | Version/Clone | Supplier                    | Catalogue Number | Host Species | IF Dilution                       | IHC Dilution |
|----------------------------------|-----------------------|---------------|-----------------------------|------------------|--------------|-----------------------------------|--------------|
| Mouse                            | anti-AR               | (N-20)        | SCBT                        | sc-816           | Rabbit       | 1:50                              | 1:750        |
| Mouse                            | anti-AR               | (ΔN1-15)      | Thermo Scientific<br>Pierce | MA1150           | Rat          | 1:50 when diluted to 1mg/ml stock |              |
| Human<br>(Not Mouse)             | anti-AR               | (AR27)        | Novocastra                  | NCL-AR-318       | Mouse        |                                   | 1:50         |
| Mouse/Human                      | anti-c-MYC            |               | Millipore                   | 06-340           | Rabbit       | 1:50                              | 1:50-1:200   |
| Mouse                            | anti-FASN             | (G-11)        | SCBT                        | sc-48357         | Mouse        | 1:100                             | 1:50 m.o.m   |
| Mouse                            | anti-p53              | (CM5)         | Novocastra                  | P53-CM5P         | Rabbit       |                                   | 1:200        |
| Human (Not Mouse)                | anti-p53              | (DO-7)        | Dako                        | M7001            | Mouse        |                                   | 1:1000       |
| Mouse                            | anti-PPAR $\gamma$    | (E-8)         | SCBT                        | sc-7273          | Mouse        | 1:100                             |              |
| Mouse                            | anti-PCNA             | (C-20)        | SCBT                        | sc-9857          | Goat         | 1:100                             |              |
| Mouse                            | anti- $\gamma$ H2AX   | (JBW301)      | Millipore                   | 05-636           | Mouse        | 1:500                             |              |
| Mouse                            | anti-Involucrin (IVL) | (ERLI-3)      | CRUK                        | in house         | Rabbit       | 1:200                             |              |
| Mouse                            | anti-BLIMP1           | (6D3)         | eBiosciences                | 14-5963          | Rat          | 1:50                              |              |
| Mouse                            | anti-Ki67             | (Tec-3)       | Dako                        | M7249            | Rat          | 1:100                             | 1:500        |
| Mouse                            | anti-Ki67             | (SP6)         | Vector Labs                 | VP-RM04          | Rabbit       |                                   | 1:100        |
| Mouse                            | Anti-ER $\alpha$      | (MC-20)       | SCBT                        | sc-542           | Rabbit       |                                   | 1:50         |

IF: immunofluorescence staining; IHC: immunohistochemical staining; m.o.m: mouse on mouse.
